# Supplementary material
Source: PubMed Central journal article supplement (PMC4959965)
Supplement: NIHMS789220-supplement-Supplemental_Digital_Content.pdf [file NIHMS789220-supplement-Supplemental_Digital_Content.pdf]

## **Appendix 1. Acknowledgment**

Institutions involved in the Consortium include, in alphabetical order: Baystate Medical Center, Springfield, MA; Cedars-Sinai Medical Center Burnes Allen Research Center, Los Angeles, CA; Christiana Care Health System, Newark, DE; Georgetown University Hospital , MedStar Health, Washington, DC; Indiana University Clarian Health, Indianapolis, IN; Intermountain Healthcare and the University of Utah, Salt Lake City, Utah; Maimonides Medical Center, Brooklyn, NY; MetroHealth Medical Center, Cleveland, OH.; Summa Health System, Akron City Hospital, Akron, OH; The EMMES Corporation, Rockville MD (Data Coordinating Center); University of Illinois at Chicago, Chicago, IL; University of Miami, Miami, FL; and University of Texas Health Science Center at Houston, Houston, Texas.

Kawakita T, Reddy UM, Iqbal SN, Landy HJ, Huang C-C, Hoffman M, et al. Duration of oxytocin and rupture of the membranes before diagnosing a failed induction of labor. *Obstet Gynecol* 2016; 128.

The authors provided this information as a supplement to their article.

**Appendix 2.**

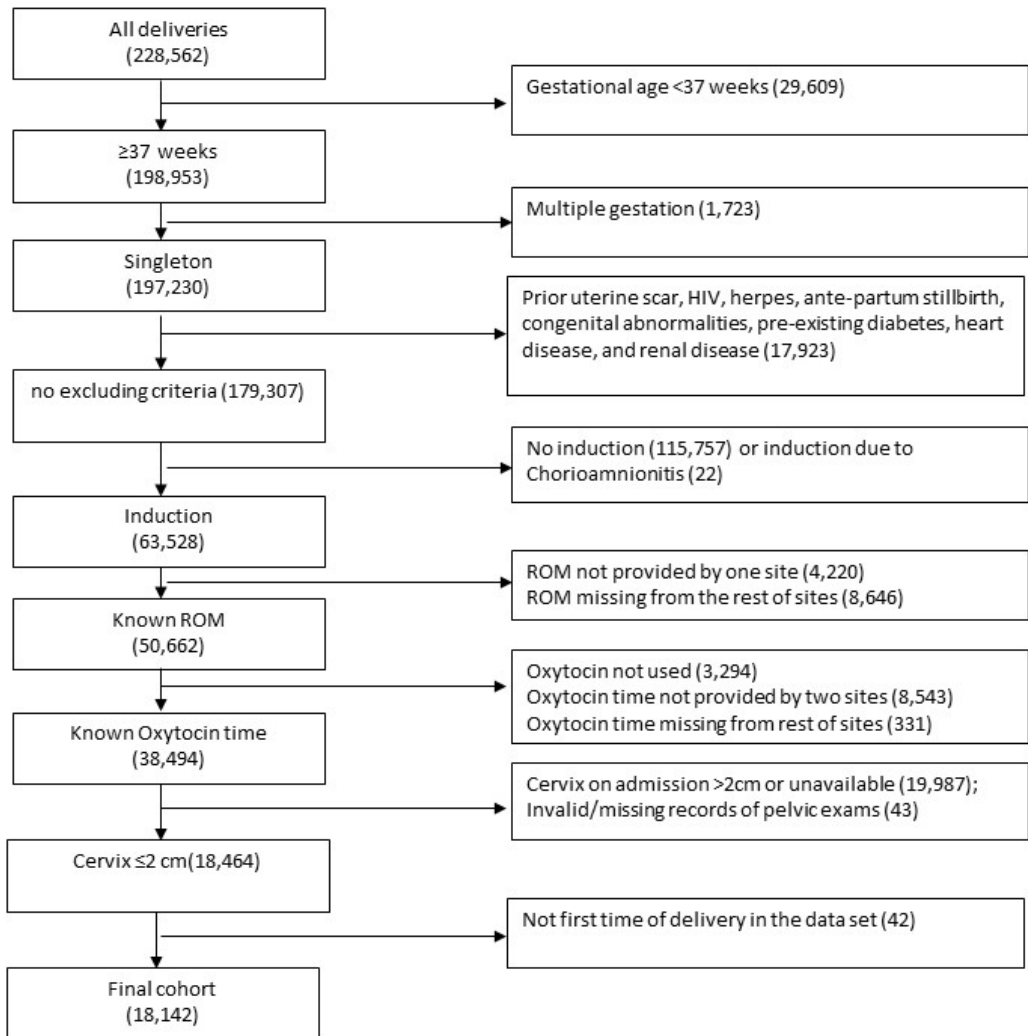

Kawakita T, Reddy UM, Iqbal SN, Landy HJ, Huang C-C, Hoffman M, et al. Duration of oxytocin and rupture of the membranes before diagnosing a failed induction of labor. *Obstet Gynecol* 2016; 128.

The authors provided this information as a supplement to their article.

**Appendix 3. Rates of Maternal Outcomes and Neonatal Outcomes by Duration of Oxytocin and Rupture of Membranes in Nulliparous Women**

| Duration of oxytocin and ROM        | Chorioamnionitis | Endometritis | Postpartum hemorrhage | NICU      | Mechanical ventilation | Neonatal sepsis |
|-------------------------------------|------------------|--------------|-----------------------|-----------|------------------------|-----------------|
| At 6 hours                          |                  |              |                       |           |                        |                 |
| Latent phase (n=3,506)              | 234 (6.7)        | 76 (2.2)     | 180 (5.1)             | 222 (6.3) | 38 (1.1)               | 37 (1.1)        |
| Active phase or delivered (n=6,257) | 214 (3.4)        | 62 (1.0)     | 219 (3.5)             | 407 (6.5) | 47 (0.8)               | 79 (1.3)        |
| P-value                             | <.001            | <.001        | <.001                 | .76       | .11                    | .38             |
| Adjusted P-value                    | <.001            | <.001        | <.001                 | .66       | .11                    | .98             |
| At 9 hours                          |                  |              |                       |           |                        |                 |
| Latent phase (n=1,564)              | 136 (8.7)        | 46 (2.9)     | 96 (6.1)              | 104 (6.7) | 17 (1.1)               | 22 (1.4)        |
| Active phase or delivered (n=8,199) | 312 (3.8)        | 92 (1.1)     | 303 (3.7)             | 525 (6.4) | 68 (0.8)               | 94 (1.2)        |
| P-value                             | <.001            | <.001        | <.001                 | .69       | .30                    | .37             |
| Adjusted P-value                    | <.001            | <.001        | <.001                 | .49       | .42                    | .22             |
| At 12 hours                         |                  |              |                       |           |                        |                 |
| Latent phase (n=636)                | 77 (12.1)        | 23 (3.6)     | 33 (5.2)              | 55 (8.7)  | 7 (1.1)                | 12 (1.9)        |
| Active phase or delivered (n=9,127) | 371 (4.1)        | 115 (1.3)    | 366 (4.0)             | 574 (6.3) | 78 (0.9)               | 104 (1.1)       |
| P-value                             | <.001            | <.001        | .15                   | .02       | .50                    | .13             |
| Adjusted P-value                    | <.001            | <.001        | .16                   | .01       | .70                    | .07             |

Kawakita T, Reddy UM, Iqbal SN, Landy HJ, Huang C-C, Hoffman M, et al. Duration of oxytocin and rupture of the membranes before diagnosing a failed induction of labor. *Obstet Gynecol* 2016; 128.

The authors provided this information as a supplement to their article.

At 15 hours

|                                     |           |           |           |           |          |           |
|-------------------------------------|-----------|-----------|-----------|-----------|----------|-----------|
| Latent phase (n=277)                | 36 (13.0) | 12 (4.3)  | 18 (6.5)  | 29 (10.5) | 3 (1.1)  | 5 (1.8)   |
| Active phase or delivered (n=9,486) | 412 (4.3) | 126 (1.3) | 381 (4.0) | 600 (6.3) | 82 (0.9) | 111 (1.2) |
| P-value                             | <.001     | <.001     | .05       | <.01      | .74      | .39       |
| Adjusted P-value                    | <.001     | <.01      | .04       | <.01      | .85      | .29       |

At 18 hours

|                                     |           |           |           |           |          |           |
|-------------------------------------|-----------|-----------|-----------|-----------|----------|-----------|
| Latent phase (n=137)                | 14 (10.2) | 4 (2.9)   | 4 (2.9)   | 15 (11.0) | 3 (2.2)  | 3 (2.2)   |
| Active phase or delivered (n=9,626) | 438 (4.5) | 134 (1.4) | 395 (4.1) | 614 (6.4) | 82 (0.9) | 113 (1.2) |
| P-value                             | <.01      | .13       | .66       | .05       | .12      | .22       |
| Adjusted P-value                    | <.01      | .31       | .50       | .02       | .16      | .28       |

Abbreviations: ROM (rupture of membranes), NICU (neonatal intensive care unit)

Number shown as n (%). Percentages represent eventual outcomes.

Latent phase was defined as cervical exam less than 6 cm dilation.

Active phase was defined as a last cervical examination of greater than or equal to 6 cm dilation.

Adjusted P-value, controlled for age, race/ethnicity, BMI, insurance, region, hypertensive disease, and gestational diabetes.

Kawakita T, Reddy UM, Iqbal SN, Landy HJ, Huang C-C, Hoffman M, et al. Duration of oxytocin and rupture of the membranes before diagnosing a failed induction of labor. *Obstet Gynecol* 2016; 128.

The authors provided this information as a supplement to their article.

**Appendix 4. Rates of Maternal Outcomes and Neonatal Outcomes by Duration of Oxytocin and Rupture of Membranes in Multiparous Women**

| Duration of oxytocin and ROM        | Chorioamnionitis | Endometritis | Postpartum hemorrhage | NICU      | Mechanical ventilation | Neonatal sepsis |
|-------------------------------------|------------------|--------------|-----------------------|-----------|------------------------|-----------------|
| At 6 hours                          |                  |              |                       |           |                        |                 |
| Latent phase (n=1,380)              | 24 (1.7)         | 5 (0.4)      | 57 (4.1)              | 68 (4.9)  | 4 (0.3)                | 8 (0.6)         |
| Active phase or delivered (n=6,999) | 43 (0.6)         | 20 (0.3)     | 211 (3.0)             | 270 (3.9) | 38 (0.5)               | 31 (0.4)        |
| P-value                             | <.001            | .59          | .04                   | .07       | .30                    | .51             |
| Adjusted P-value                    | <.001            | .82          | .04                   | .08       | .16                    | .34             |
| At 9 hours                          |                  |              |                       |           |                        |                 |
| Latent phase (n=377)                | 15 (4.0)         | 2 (0.5)      | 18 (4.8)              | 20 (5.3)  | 1 (0.3)                | 3 (0.8)         |
| Active phase or delivered (n=8,002) | 52 (0.7)         | 23 (0.3)     | 250 (3.1)             | 318 (4.0) | 41 (0.5)               | 36 (0.5)        |
| P-value                             | <.001            | .31          | .10                   | .23       | 1.00                   | .26             |
| Adjusted P-value                    | <.001            | .66          | .10                   | .36       | .41                    | .32             |
| At 12 hours                         |                  |              |                       |           |                        |                 |
| Latent phase (n=123)                | 6 (4.9)          | 1 (0.8)      | 12 (9.8)              | 8 (6.5)   | 0(0)                   | 1 (0.8)         |
| Active phase or delivered (n=8,256) | 61 (0.7)         | 24 (0.3)     | 256 (3.1)             | 330 (4.0) | 42 (0.5)               | 38 (0.5)        |
| P-value                             | <.001            | .31          | <.001                 | .16       | 1.00                   | .44             |
| Adjusted P-value                    | <.001            | .56          | <.001                 | .35       | NA                     | .61             |
| At 15 hours                         |                  |              |                       |           |                        |                 |

Kawakita T, Reddy UM, Iqbal SN, Landy HJ, Huang C-C, Hoffman M, et al. Duration of oxytocin and rupture of the membranes before diagnosing a failed induction of labor. *Obstet Gynecol* 2016; 128.

The authors provided this information as a supplement to their article.

|                                        |          |          |           |           |           |          |
|----------------------------------------|----------|----------|-----------|-----------|-----------|----------|
| Latent phase (n=54)                    | 6 (11.1) | 1 (1.9)  | 8 (14.8)  | 5 (9.3)   | 0 (0)     | 1 (1.9)  |
| Active phase or delivered<br>(n=8,325) | 61 (0.7) | 24 (0.3) | 260 (3.1) | 333 (4.0) | 42(0.5)   | 38 (0.5) |
| P-value                                | <.001    | .15      | <.001     | .07       | 1.00      | .22      |
| Adjusted P-value                       | <.001    | .20      | <.001     | .17       | NA        | .21      |
| At 18 hours                            |          |          |           |           |           |          |
| Latent phase (n=28)                    | 4 (14.3) | 0 (0)    | 2 (7.1)   | 3 (10.7)  | 0 (0)     | 1 (3.6)  |
| Active phase or delivered<br>(n=8,351) | 63 (0.8) | 25 (0.3) | 266 (3.2) | 335 (4.0) | 42 (0.50) | 38 (0.5) |
| P-value                                | <.001    | 1.00     | .23       | .10       | 1.00      | .12      |
| Adjusted P-value                       | <.001    | NA       | .27       | .23       | NA        | .07      |

Abbreviations: ROM (rupture of membranes), NICU (neonatal intensive care unit), NA (not available)

Number shown as n (%). Percentages represent eventual outcomes.

Latent phase was defined as cervical exam less than 6 cm dilation.

Active phase was defined as a last cervical examination of greater than or equal to 6 cm dilation.

Adjusted P-value, controlled for age, race/ethnicity, BMI, insurance, region, hypertensive disease, and gestational diabetes

Kawakita T, Reddy UM, Iqbal SN, Landy HJ, Huang C-C, Hoffman M, et al. Duration of oxytocin and rupture of the membranes before diagnosing a failed induction of labor. *Obstet Gynecol* 2016; 128.

The authors provided this information as a supplement to their article.
